# Supplementary material for: The onset of copper-ion mobility and the electronic transition in the kesterite Cu2ZnGeSe4
Source: Royal Society of Chemistry journal article supplement (doi:10.1039/d1ta08642a), 2021-01-01
Supplement: d1ta08642a1.pdf [file d1ta08642a1.pdf]

# The Onset of Copper-Ion Mobility and the Electronic Transition in the Kesterite $\text{Cu}_2\text{ZnGeSe}_4$

Panagiotis Mangelis<sup>a</sup>, Paz Vaqueiro<sup>a</sup>, Ronald I. Smith<sup>b</sup> and Anthony V. Powell<sup>\*a</sup>

<sup>a</sup> *Department of Chemistry, University of Reading, Whiteknights, Reading RG6 6AD, England, United Kingdom*

<sup>b</sup> *ISIS Pulsed Neutron and Muon Source, Rutherford Appleton Laboratory, Harwell Campus, Didcot, OX11 0QX, UK*

## Supplementary Information

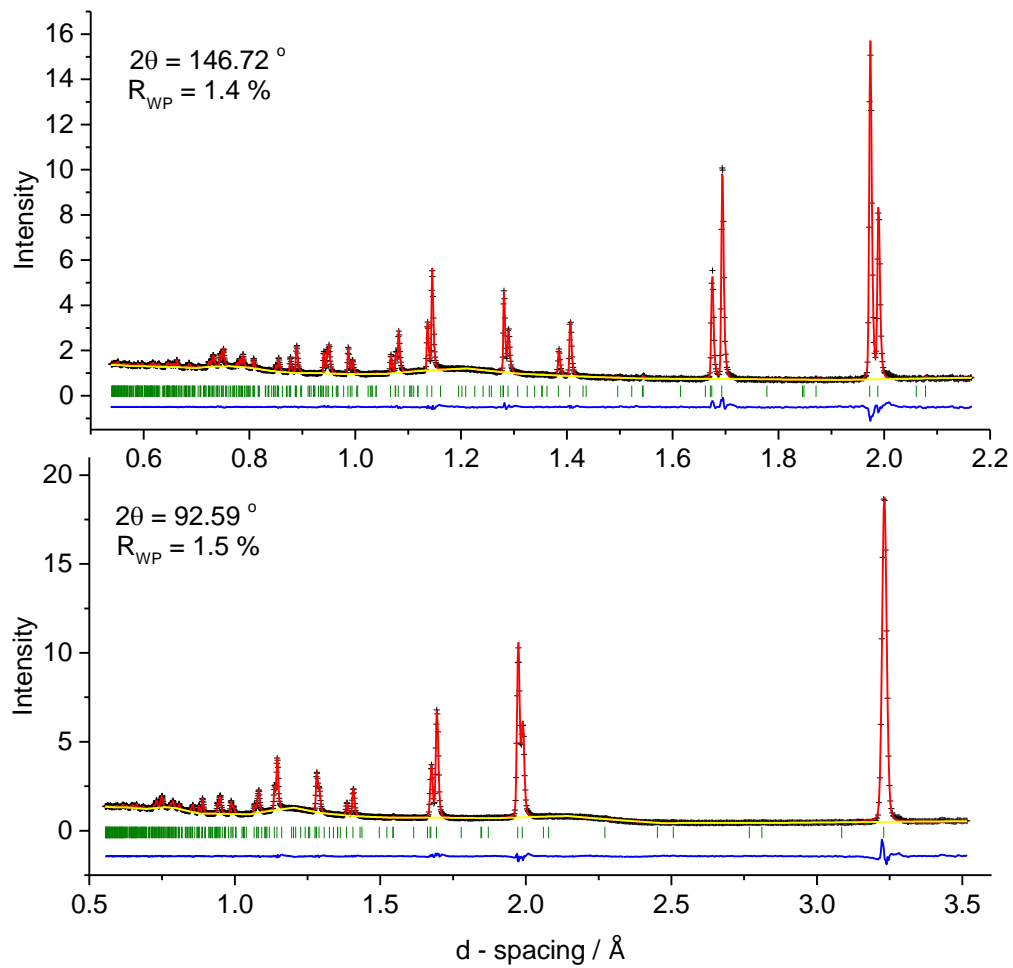

**Figure S1** Rietveld refinement for  $\text{Cu}_2\text{ZnGeS}_4$  using powder neutron diffraction data collected at 450 K ( $\chi^2 = 2.990$ ). Observed (black crosses), refined (red solid lines), difference (blue bottom line) and calculated background (yellow line) profiles. Reflection positions are marked by olive lines.

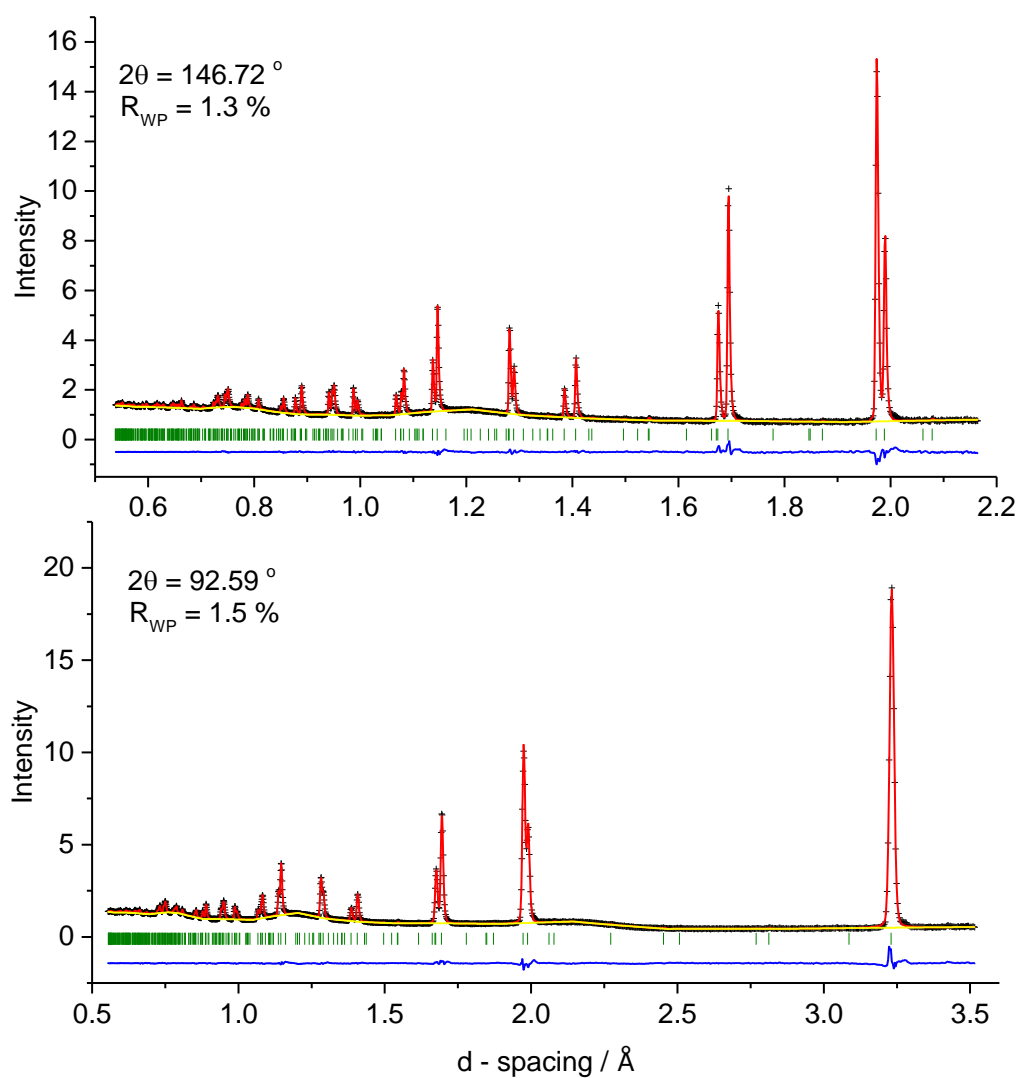

**Figure S2** Rietveld refinement for  $\text{Cu}_2\text{ZnGeS}_4$  using powder neutron diffraction data collected at 473 K ( $\chi^2 = 2.806$ ). Observed (black crosses), refined (red solid lines), difference (blue bottom line) and calculated background (yellow line) profiles. Reflection positions are marked by olive lines.

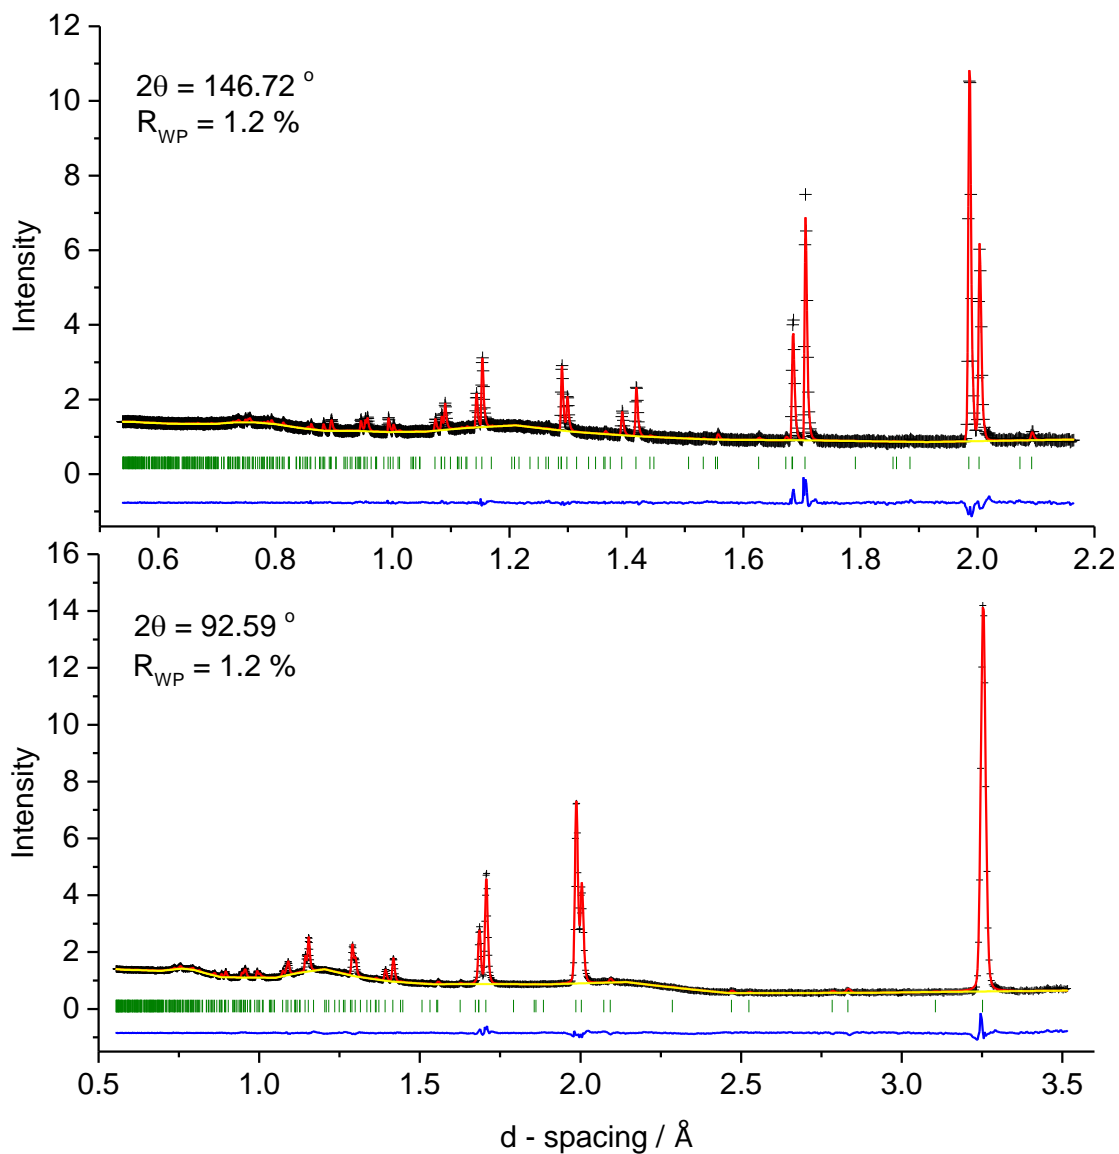

**Figure S3** Rietveld refinement for  $\text{Cu}_2\text{ZnGeS}_4$  using powder neutron diffraction data collected at 473 K ( $\chi^2 = 2.064$ ). Observed (black crosses), refined (red solid lines), difference (blue bottom line) and calculated background (yellow line) profiles. Reflection positions are marked by olive lines.
